# Supplementary material for: Model Re-Estimation: An Alternative for Poor Predictive Performance during External Evaluations? Example of Gentamicin in Critically Ill Patients
Source: MDPI journal article supplement (doi:10.3390/pharmaceutics14071426), 2022-07-07
Supplement: s1 [file s1]

## Supplementary Information

**Table S1.** Summary of the characteristics of the evaluated PopPK models.

| Model                    | Cmpt | Cov          | Error        | eCL  | IIV <sub>CL</sub><br>(%) | eV or<br>V <sub>1</sub> | IIV <sub>V</sub><br>or V <sub>1</sub><br>(%) | eQ   | IIV <sub>Q</sub><br>(%) | eV <sub>2</sub> | IIV <sub>V2</sub><br>(%) | Residual variability |                    | Model equations                                                                                                    |
|--------------------------|------|--------------|--------------|------|--------------------------|-------------------------|----------------------------------------------|------|-------------------------|-----------------|--------------------------|----------------------|--------------------|--------------------------------------------------------------------------------------------------------------------|
|                          |      |              |              |      |                          |                         |                                              |      |                         |                 |                          | Proportional<br>(%)  | Additive<br>(mg/L) |                                                                                                                    |
| Rea RS et al.<br>[13]    | 1    | GFR,<br>BW   | Mixed        | 3.14 | 83.7                     | 53                      | 64.4                                         | -    | -                       | -               | -                        | 24.3                 | 0.381              | CL= (3.14 x GFR <sup>1.2</sup> ) /<br>(54.8 <sup>1.2</sup> + GFR <sup>1.2</sup> )<br>V <sub>1</sub> = 53 x (BW/70) |
| Bos JC et<br>al.[14]     | 1    | CrCl         | Mixed        | 5.7  | 74                       | 19                      | 49                                           | -    | -                       | -               | -                        | 32                   | 0.056              | CL=5.7 x (1 + 0.0091 x<br>(CrCl-74))                                                                               |
| Hodiamont<br>et al.[15]  | 2    | IBW,<br>ALBM | Proportional | 1.15 | 42.5                     | 21.2                    | 17.2                                         | 1.96 | -                       | 18.4            | -                        |                      |                    | CL= 1.15 x (IBW/70) <sup>0.75</sup><br>V <sub>1</sub> = 21.2 x (IBW/70) x<br>(ALBM/22) <sup>-0.833</sup>           |
| Hodiamont<br>et al. [16] | 2    | -            | Mixed        | 2.3  | 75.0                     | 21.6                    | 27.0                                         | 1.3  | -                       | 10.2            | -                        | 19.4                 | 0.13               | CL=2.3 x (BW/70) <sup>0.75</sup><br>Q= 1.3 x (BW/70) <sup>0.75</sup><br>V <sub>1</sub> = 21.6 x (BW/70)            |

*Cmpt*, compartment; *Cov*, covariates, *CL*, clearance; *V*, central volume of distribution; *V<sub>1</sub>*, volume of distribution of the first compartment; *Q*, inter-compartmental clearance; *V<sub>2</sub>*, volume of distribution of the second compartment; *IIV*, interindividual variability, *ALBM*, Albumin, *CrCl*, creatinine clearance; *GFR*, glomerular filtration rate, *BW*, bodyweight, *IBW*, ideal bodyweight.

**Table S2.** Summary of the characteristics of the re-estimated PopPK models.

| Model                 | Cmpt | Cov       | Error        | $\sigma_{CL}$                         | $IIV_{CL}$<br>(%)                      | $\sigma_V$ or<br>$V_1$ | $IIV_V$<br>or $V_1$<br>(%) | $\sigma_Q$ | $IIV_Q$<br>(%) | $\sigma_{V_2}$ | $IIV_{V_2}$<br>(%) | Model equations                                                                                                |
|-----------------------|------|-----------|--------------|---------------------------------------|----------------------------------------|------------------------|----------------------------|------------|----------------|----------------|--------------------|----------------------------------------------------------------------------------------------------------------|
| Rea RS et al. [13]    | 1    | GFR, BW   | Mixed        | 9.31 <sup>a</sup><br>129 <sup>b</sup> | 36.9 <sup>a</sup><br>18.3 <sup>b</sup> | 21.7                   | 28.8                       | -          | -              | -              | -                  | $CL = (\sigma_{CL,a} \times GFR^{1.2}) / (\sigma_{CL,b}^{1.2} + GFR^{1.2})$<br>$V_1 = \sigma_V \times (BW/70)$ |
| Bos JC et al.[14]     | 1    | CrCl      | Mixed        | 3.44                                  | 27.1                                   | 22.4                   | 39.4                       | -          | -              | -              | -                  | $CL = 3.44 \times (1 + 0.00925 \times (CrCl - 92))$                                                            |
| Hodiamont et al.[15]  | 2    | IBW, ALBM | Proportional | 2.12                                  | 49.1                                   | 23.9                   | 45.7                       | 1.95       | -              | 18.1           | -                  | $CL = 2.11 \times (IBW/70)^{0.75}$<br>$V_1 = 21.2 \times (IBW/70) \times (ALBM/22)^{-0.833}$                   |
| Hodiamont et al. [16] | 2    | -         | Mixed        | 1.63                                  | 54.8                                   | 8.67                   | 45.7                       | 0.943      | -              | 6.78           | -                  | $CL = 1.63 \times (BW/70)^{0.75}$<br>$Q = 0.943 \times (BW/70)^{0.75}$<br>$V_1 = 8.67 \times (BW/70)$          |

*Cmpt*, compartment; *Cov*, covariates, *CL*, clearance; *V*, central volume of distribution; *V<sub>1</sub>*, volume of distribution of the first compartment; *Q*, inter-compartmental clearance; *V<sub>2</sub>*, volume of distribution of the second compartment; *IIV*, interindividual variability, *ALBM*, Albumin, *CrCl*, creatinine clearance; *GFR*, glomerular filtration rate, *BW*, bodyweight, *IBW*, ideal bodyweight.

**Table S3.** Typical value of PK parameters and variability used during external evaluation and following the re-estimation of PopPK models.

| Model                    | External evaluation |                          |                        |                                              |      |                         |                |                          | Following re-estimation |                          |                        |                                              |       |                         |                |                          |
|--------------------------|---------------------|--------------------------|------------------------|----------------------------------------------|------|-------------------------|----------------|--------------------------|-------------------------|--------------------------|------------------------|----------------------------------------------|-------|-------------------------|----------------|--------------------------|
|                          | CL                  | IIV <sub>CL</sub><br>(%) | V or<br>V <sub>1</sub> | IIV <sub>V</sub><br>or V <sub>1</sub><br>(%) | Q    | IIV <sub>Q</sub><br>(%) | V <sub>2</sub> | IIV <sub>V2</sub><br>(%) | CL                      | IIV <sub>CL</sub><br>(%) | V or<br>V <sub>1</sub> | IIV <sub>V</sub><br>or V <sub>1</sub><br>(%) | Q     | IIV <sub>Q</sub><br>(%) | V <sub>2</sub> | IIV <sub>V2</sub><br>(%) |
| Rea RS et al.<br>[13]    | 1.45                | 83.7                     | 53                     | 64.4                                         | -    | -                       | -              | -                        | 2.26                    | 60.7                     | 21.7                   | 42.8                                         | -     | -                       | -              | -                        |
| Bos JC et al.<br>[14]    | 5.7                 | 74                       | 19                     | 49                                           | -    | -                       | -              | -                        | 4.01                    | 27.0                     | 22.4                   | 39.4                                         | -     | -                       | -              | -                        |
| Hodiamont<br>et al. [15] | 1.90                | 42.5                     | 21.2                   | 17.2                                         | 1.96 | -                       | 18.4           | -                        | 2.12                    | 49.1                     | 23.9                   | 45.7                                         | 1.95  | -                       | 18.1           | -                        |
| Hodiamont<br>et al. [16] | 2.3                 | 75.0                     | 21.6                   | 27.0                                         | 1.3  | -                       | 10.2           | -                        | 1.63                    | 54.8                     | 8.67                   | 45.7                                         | 0.943 | -                       | 6.78           | -                        |

CL, clearance; V, central volume of distribution; V<sub>1</sub>, volume of distribution of the first compartment; Q, inter-compartmental clearance; V<sub>2</sub>, volume of distribution of the second compartment; IIV, interindividual variability.

**Table S4.** Bootstrap Results of the Re-estimated Model from Rea et al.

| Bootstrap of re-estimated model   |       |               |
|-----------------------------------|-------|---------------|
| Parameter                         | Mean  | 95% CI        |
| eCL <sub>a</sub> (L/h)            | 9.74  | 9.62 – 9.87   |
| eCL <sub>b</sub>                  | 136   | 134 – 138     |
| eV (L)                            | 21.8  | 21.7 – 21.9   |
| Interindividual variability (IIV) |       |               |
| CL <sup>a</sup> (CV%)             | 35.9  | 35.6 – 36.2   |
| CL <sup>b</sup> (CV%)             | 16.6  | 16.3 – 16.9   |
| V (CV%)                           | 27.9  | 27.5 – 28.2   |
| Residual Error                    |       |               |
| Additive (mg/L)                   | 0.279 | 0.275 – 0.282 |
| Proportional (CV%)                | 34.4  | 34.1 – 34.6   |

*Cmpt*, compartment; *Cov*, covariates, *CL*, clearance; *V*, central volume of distribution; *V<sub>1</sub>*, volume of distribution of the first compartment; *Q*, inter-compartmental clearance; *V<sub>2</sub>*, volume of distribution of the second compartment; *IIV*, interindividual variability, *ALBM*, Albumin, *CrCl*, creatinine clearance; *GFR*, glomerular filtration rate, *BW*, bodyweight, *IBW*, ideal bodyweight.

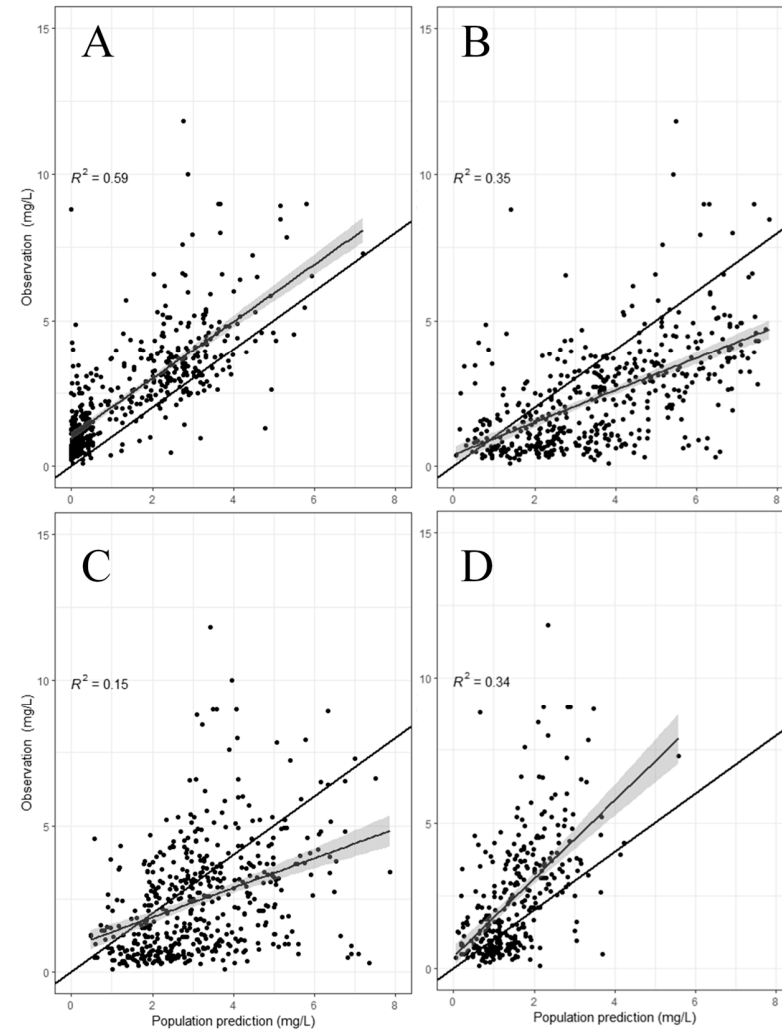

**Figure S1.** Population-predicted concentration versus observed concentrations for gentamicin models. A. Bos et al. [14], B. Hodiamont et al. [15], C. Rea et al. [13], D. Hodiamont et al [16]. Black line with shaded area represents the trendline from the scatter points.

A

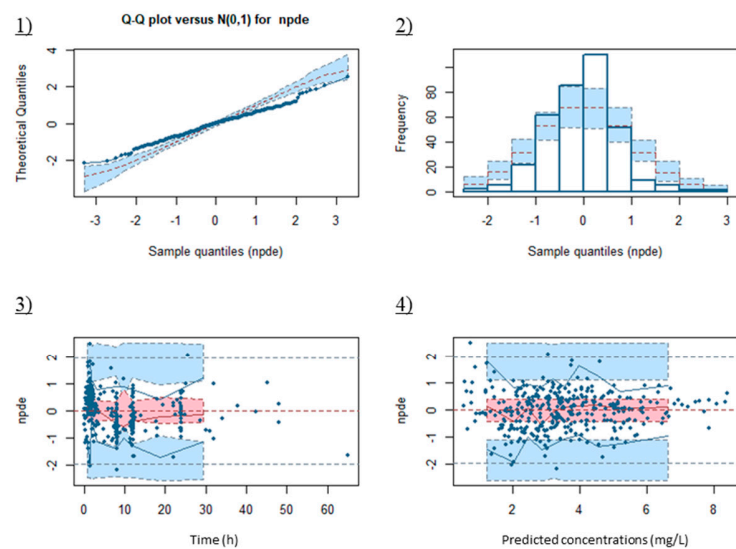

B

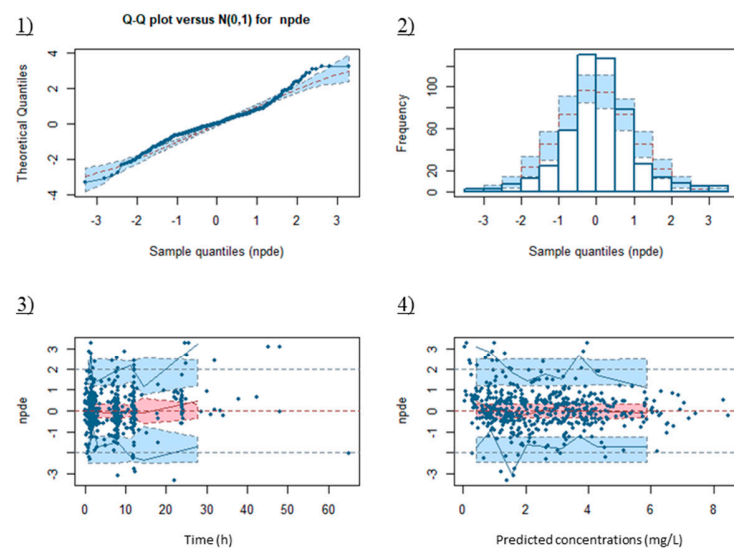

**Figure S2.** Normalized prediction distribution errors (NPDE) plots of (A) the external evaluation and (B) following model re-estimation for Rea et al. 1) Q-Q plot of the NPDE, 2) Histogram of the NPDE, 3) NPDE versus time, 4) NPDE versus predicted concentrations.

**Table S5.** Probability of target attainment of  $C_{\max}/MIC > 8$  on the 3rd dose based on different MIC values and MDD and ODD dosing regimens of gentamicin.

| MIC  | <u>3 mg/kg/day (%)</u> |            |            | <u>4 mg/kg/day (%)</u> |            |            | <u>5 mg/kg/day (%)</u> |            |            |
|------|------------------------|------------|------------|------------------------|------------|------------|------------------------|------------|------------|
|      | 1                      | 1.5        | 3          | 1.33                   | 2          | 4          | 1.67                   | 2.5        | 5          |
|      | mg/kg/q8h              | mg/kg/q12h | mg/kg/q24h | mg/kg/q8h              | mg/kg/q12h | mg/kg/q24h | mg/kg/q8h              | mg/kg/q12h | mg/kg/q24h |
| 0.25 | 91.6                   | 94.6       | 99.2       | 95.5                   | 97.7       | 99.1       | 97.7                   | 98.1       | 99.4       |
| 0.5  | 57.3                   | 75.7       | 93.8       | 77                     | 88.6       | 97.2       | 87.3                   | 93.5       | 98.0       |
| 1    | 8.6                    | 20.9       | 62.3       | 25.1                   | 47.0       | 80.7       | 41.0                   | 64.8       | 90.5       |
| 2    | 0.1                    | 0.3        | 13.3       | 0.8                    | 3.5        | 30.7       | 2.6                    | 13.2       | 51.3       |
| 4    | 0                      | 0          | 0.5        | 0                      | 0          | 2.0        | 0                      | 0          | 6.5        |

**Table S5.** Continued.

| MIC  | <u>6 mg/kg/day (%)</u> |            |            | <u>7 mg/kg/day (%)</u> |            |            | <u>8 mg/kg/day (%)</u> |            |            |
|------|------------------------|------------|------------|------------------------|------------|------------|------------------------|------------|------------|
|      | 2                      | 3          | 6          | 2.33                   | 3.5        | 7          | 2.66                   | 4          | 8          |
|      | mg/kg/q8h              | mg/kg/q12h | mg/kg/q24h | mg/kg/q8h              | mg/kg/q12h | mg/kg/q24h | mg/kg/q8h              | mg/kg/q12h | mg/kg/q24h |
| 0.25 | 99.1                   | 98.6       | 99.3       | 99.0                   | 99.4       | 100.0      | 98.7                   | 99.5       | 99.4       |
| 0.5  | 92.6                   | 96.7       | 98.5       | 95.5                   | 97.5       | 99.1       | 95.8                   | 98.3       | 99.3       |
| 1    | 57.9                   | 75.4       | 93.2       | 69.2                   | 82.5       | 96.4       | 76.2                   | 87.2       | 97.3       |
| 2    | 8.1                    | 21.4       | 61.7       | 14.5                   | 33.5       | 74.8       | 24.4                   | 44.7       | 82.8       |
| 4    | 0.1                    | 1          | 14.1       | 0.4                    | 2.5        | 22.5       | 0.8                    | 4.6        | 33.8       |

**Table S5.** Continued.

| MIC  | <u>10 mg/kg/day (%)</u> |              |               | <u>12 mg/kg/day (%)</u> |              |               |
|------|-------------------------|--------------|---------------|-------------------------|--------------|---------------|
|      | 3.33 mg/kg/q8h          | 5 mg/kg/q12h | 10 mg/kg/q24h | 3 mg/kg/q8h             | 4 mg/kg/q12h | 12 mg/kg/q24h |
| 0.25 | 99.1                    | 99.5         | 99.7          | 99.7                    | 99.6         | 99.9          |
| 0.5  | 97.4                    | 98.8         | 99.5          | 97.9                    | 99.5         | 99.8          |
| 1    | 87.4                    | 94.1         | 98.6          | 90.5                    | 96.4         | 98.8          |
| 2    | 37.7                    | 62.2         | 89.5          | 54.5                    | 77.4         | 94.2          |
| 4    | 2.7                     | 11.3         | 49.4          | 8.2                     | 20.2         | 65.8          |

*MIC*, Minimum inhibitory concentration; *q8h*, every 8 hours; *q12h*, every 12 hours, *q24h*, every 24 hours.

**Table S6.** Probability of target attainment of  $C_{\max}/MIC > 10$  on the 3rd dose based on different MIC values and MDD and ODD dosing regimens of gentamicin.

| MIC  | <u>3 mg/kg/day (%)</u> |            |            | <u>4 mg/kg/day (%)</u> |            |            | <u>5 mg/kg/day (%)</u> |            |            |
|------|------------------------|------------|------------|------------------------|------------|------------|------------------------|------------|------------|
|      | 1                      | 1.5        | 3          | 1.33                   | 2          | 4          | 1.67                   | 2.5        | 5          |
|      | mg/kg/q8h              | mg/kg/q12h | mg/kg/q24h | mg/kg/q8h              | mg/kg/q12h | mg/kg/q24h | mg/kg/q8h              | mg/kg/q12h | mg/kg/q24h |
| 0.25 | 84.7                   | 91.3       | 98.2       | 92.6                   | 96.9       | 98.7       | 92.6                   | 97.4       | 99.4       |
| 0.5  | 37.5                   | 60.1       | 89.2       | 61.1                   | 78.8       | 94.2       | 61.1                   | 88.4       | 97.4       |
| 1    | 2.1                    | 8.5        | 46.2       | 9.5                    | 27.8       | 67.2       | 22.4                   | 44.7       | 82.0       |
| 2    | 0                      | 0          | 5.9        | 0                      | 0.6        | 15.5       | 0.2                    | 4.3        | 32.8       |
| 4    | 0                      | 0          | 0          | 0                      | 0          | 0.8        | 0                      | 0          | 2.0        |

**Table S6.** Continued.

| MIC  | <u>6 mg/kg/day (%)</u> |            |            | <u>7 mg/kg/day (%)</u> |            |            | <u>8 mg/kg/day (%)</u> |            |            |
|------|------------------------|------------|------------|------------------------|------------|------------|------------------------|------------|------------|
|      | 2                      | 3          | 6          | 2.33                   | 3.5        | 7          | 2.66                   | 4          | 8          |
|      | mg/kg/q8h              | mg/kg/q12h | mg/kg/q24h | mg/kg/q8h              | mg/kg/q12h | mg/kg/q24h | mg/kg/q8h              | mg/kg/q12h | mg/kg/q24h |
| 0.25 | 96.1                   | 98.4       | 99.0       | 97.8                   | 98.9       | 99.8       | 98.3                   | 99.3       | 99.4       |
| 0.5  | 77.1                   | 92.8       | 97.8       | 85.7                   | 96.0       | 98.2       | 92.0                   | 97.1       | 98.9       |
| 1    | 22.4                   | 60.8       | 86.5       | 38.7                   | 73.0       | 92.5       | 61.0                   | 77.8       | 94.6       |
| 2    | 0.2                    | 10.2       | 47.0       | 2.2                    | 18.2       | 60.1       | 12.0                   | 26.1       | 71.2       |
| 4    | 0                      | 0.3        | 6.1        | 0                      | 0.8        | 11.3       | 0                      | 1.1        | 19.1       |

**Table S6.** Continued.

| MIC  | <u>10 mg/kg/day (%)</u> |              |               | <u>12 mg/kg/day (%)</u> |              |               |
|------|-------------------------|--------------|---------------|-------------------------|--------------|---------------|
|      | 3.33 mg/kg/q8h          | 5 mg/kg/q12h | 10 mg/kg/q24h | 3 mg/kg/q8h             | 4 mg/kg/q12h | 12 mg/kg/q24h |
| 0.25 | 98.9                    | 99.5         | 99.7          | 99.6                    | 99.6         | 99.9          |
| 0.5  | 96.2                    | 98.3         | 99.1          | 97.1                    | 98.7         | 99.6          |
| 1    | 76.0                    | 89.2         | 97.1          | 83.7                    | 92.6         | 98.5          |
| 2    | 20.5                    | 43.7         | 80.6          | 35.6                    | 59.7         | 90.0          |
| 4    | 0.4                     | 3.9          | 31.6          | 2.7                     | 9.1          | 46.3          |

MIC, Minimum inhibitory concentration; q8h, every 8 hours; q12h, every 12 hours, q24h, every 24 hours.



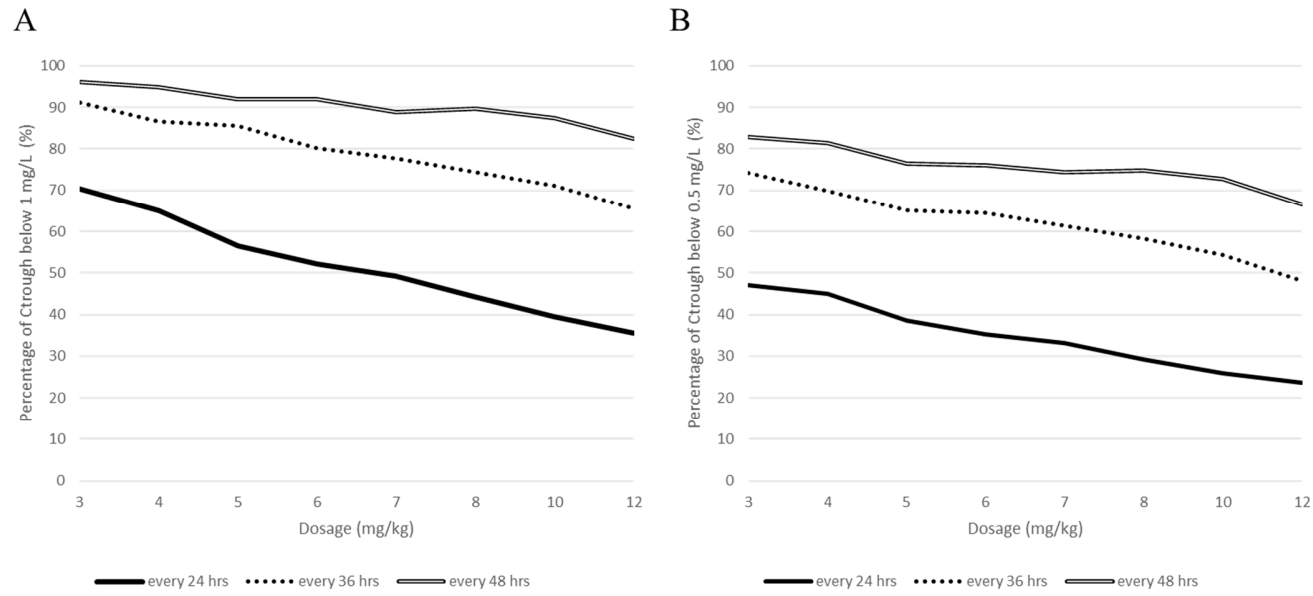

**Figure S3.** Percentage of  $C_{\text{trough}}$  following different dosage regimens (every 24 hours, every 36 hours and every 48 hours) and dosing interval below **A.** 1 mg/L **B.** 0.5 mg/L.

**Table S7.** Percentage of  $C_{\text{trough}}$  below 1 mg/L or 0.5 mg/L before the 4<sup>th</sup> administration following different dosage regimens and dosing interval below.

| $C_{\text{trough}}$<br>(mg/L) | <u>3 mg/kg (%)</u> |      |      |      |      | <u>4 mg/kg (%)</u> |      |      |      |      |
|-------------------------------|--------------------|------|------|------|------|--------------------|------|------|------|------|
|                               | Q8h                | Q12h | Q24h | Q36h | Q48h | Q8h                | Q12h | Q24h | Q36h | Q48h |
| < 1                           | 4.8                | 18.9 | 70.3 | 91.1 | 96.1 | 3.6                | 14.3 | 65.0 | 86.7 | 95.0 |
| < 0.5                         | 1.5                | 8.9  | 47.0 | 74.2 | 82.8 | 1.7                | 6.8  | 45.0 | 69.9 | 81.5 |

Table S7 Continued.

| C <sub>trough</sub> (mg/L) | <u>5 mg/kg (%)</u> |      |      |      |      | <u>6 mg/kg (%)</u> |      |      |      |      |
|----------------------------|--------------------|------|------|------|------|--------------------|------|------|------|------|
|                            | Q8h                | Q12h | Q24h | Q36h | Q48h | Q8h                | Q12h | Q24h | Q36h | Q48h |
| < 1                        | 2.9                | 9    | 56.5 | 85.6 | 92.0 | 2.2                | 8.8  | 52.1 | 80.3 | 92.0 |
| < 0.5                      | 1.2                | 4.5  | 38.5 | 65.1 | 76.4 | 0.9                | 3.7  | 35.2 | 64.5 | 76.0 |

Table S7 Continued.

| C <sub>trough</sub> (mg/L) | <u>7 mg/kg (%)</u> |      |      |      |      | <u>8 mg/kg (%)</u> |      |      |  |
|----------------------------|--------------------|------|------|------|------|--------------------|------|------|--|
|                            | Q8h                | Q12h | Q24h | Q36h | Q48h | Q24h               | Q36h | Q48h |  |
| < 1                        | 2.5                | 6.9  | 49.3 | 77.7 | 89.0 | 44.2               | 74.3 | 89.8 |  |
| < 0.5                      | 1.3                | 3.6  | 33.1 | 61.3 | 74.4 | 29.3               | 58.3 | 74.8 |  |

Table S7 Continued.

| C <sub>trough</sub> (mg/L) | <u>10 mg/kg (%)</u> |      |      | <u>12 mg/kg (%)</u> |      |      |
|----------------------------|---------------------|------|------|---------------------|------|------|
|                            | Q24h                | Q36h | Q48h | Q24h                | Q36h | Q48h |
| < 1                        | 39.6                | 71.1 | 87.5 | 35.6                | 65.5 | 82.4 |
| < 0.5                      | 25.9                | 54.4 | 72.8 | 23.6                | 48.1 | 66.6 |

C<sub>trough</sub>, concentration before the 4<sup>th</sup> administration; MIC, Minimum inhibitory concentration; q8h, every 8 hours, q12h, every 12 hours, q24h, every 24 hours; q36h, every 36 hours; q48h, every 48 hours .
